# Supplementary material for: Integrated Model of De Novo and Inherited Genetic Variants Yields Greater Power to Identify Risk Genes
Source: PubMed Central journal article supplement (PMC3744441; doi:10.1371/journal.pgen.1003671), 2013-08-15
Supplement: pgen.1003671.s006.pdf [file pgen.1003671.s006.pdf]

| Parameter      | LoF                  | Mis3                 |
|----------------|----------------------|----------------------|
| $\bar{\gamma}$ | 20.2                 | 4.7                  |
| $\beta$        | 1                    | 1                    |
| $\bar{q}_1$    | $3.0 \times 10^{-5}$ | $6.0 \times 10^{-4}$ |
| $\nu_1$        | 10000                | 2000                 |
| $\bar{q}_0$    | $6.2 \times 10^{-4}$ | $3.7 \times 10^{-3}$ |
| $\nu_0$        | 800                  | 206                  |

**Table 1:** Parameters from Hierarchical Bayes estimation. The LoF and damaging missense (Mis3) mutations of ASD genes have high relative risks, and appear to be under stronger purifying selection than non-ASD genes.
