# Supplementary material for: Integrated Model of De Novo and Inherited Genetic Variants Yields Greater Power to Identify Risk Genes
Source: PubMed Central journal article supplement (PMC3744441; doi:10.1371/journal.pgen.1003671), 2013-08-15
Supplement: pgen.1003671.s007.pdf [file pgen.1003671.s007.pdf]

| Type       | Proband | Sibling |
|------------|---------|---------|
| Silent     | 214     | 124     |
| Missense1  | 158     | 114     |
| Missense2  | 78      | 55      |
| Missense3  | 319     | 147     |
| Nonsense   | 51      | 16      |
| Splice     | 18      | 3       |
| Total SNV  | 842     | 461     |
| Frameshift | 54      | 15      |

**Table 2:** The statistics of the *de novo* mutations in autism probands and unaffected siblings. The missense labels are based on predictions from PolyPhen2. Missense1-3 correspond to “benign”, “possibly damaging” and “probably damaging” mutations, respectively. The last row is the counts of frameshift indels.
